# Supplementary material for: Analysis of Exercise-Induced Periodic Breathing Using an Autoregressive Model and the Hilbert-Huang Transform
Source: Comput Math Methods Med. 2018 Jun 26;2018:4860204. doi: 10.1155/2018/4860204 (PMC6038683; doi:10.1155/2018/4860204)
Supplement: Supplementary Materials — Supplemental Table 1: computed peaks for the decomposed intrinsic mode functions (IMFs) from exercise ventilation signals of 61 chronic heart failure patients. [file 4860204.f1.xlsx]

## Sheet: 工作表1
14	17	9	5	2	47		14	7	17	18		9	10
0	23	12	6	3	44		0	6	23	22		12	10
11	22	9	4	2	48		11	0	22	22		9	15
5	21	9	4	3	42		5	2	21	21		9	11
11	20	11	3	2	47		11	7	20	20		11	12
3	19	13	5	2	42		3	0	19	24		13	11
0	21	10	3	2	36		0	5	21	19		10	13
13	18	12	6	2	51		13	3	18	22		12	10
2	21	12	7	3	45		2	9	21	21		12	13
0	22	9	5	2	38		0	0	22	23		9	12
4	21	13	6	3	47		4	7	21	21		13	12
0	18	10	4	2	34		0	2	18	22		10	13
7	21	11	5	2	46		7	2	21	21		11	14
0	24	12	7	3	46		0	5	24	22		12	12
4	23	12	5	2	46		4	14	23	24		12	10
0	19	10	5	2	36		0	2	19	21		10	13
12	19	12	4	2	49		12	13	19	19		12	11
4	19	10	6	2	41		4	0	19	25		10	12
0	20	10	4	2	36		0	2	20	23		10	11
6	21	8	3	2	40		6	3	21	23		8	10
7	18	10	5	2	42		4.8	13	20.45	20		10.7	11
6	22	10	5	2	45		4.92683	11		22			11
0	22	15	5	3	45			2		22			11
2	21	11	5	2	41			10		19			11
7	20	12	7	4	50			11		21			11
0	24	11	5	3	43			8		20			12
5	19	13	4	2	43			7		19			12
3	22	10	5	3	43			0		18			8
9	21	13	6	2	51			0		23			12
0	23	12	4	2	41			15		25			11
7	21	12	4	2	46			0		19			13
2	22	13	6	2	45			4		23			12
2	21	14	6	3	46			10		19			11
5	22	12	5	3	47			12		21			10
14	24	10	5	2	55			0		21			11
2	21	13	6	2	44			5		22			10
13	19	11	5	3	51			3		22			12
0	25	12	6	3	46			3		23			12
2	23	11	5	3	44			9		22			12
3	23	10	5	3	44			6		19			9
13	20	11	5	3	52			4		23			11
11	22	11	5	2	51			5.41463		21.3659			11.4146
2	22	11	4	2	41			4.48317
10	19	11	4	2	46
11	21	11	6	2	51
8	20	12	5	2	47
7	19	12	6	3	47
0	18	8	3	2	31
0	23	12	6	2	43
15	25	11	4	2	57
0	19	13	5	3	40
4	23	12	7	3	49
10	19	11	5	2	47
12	21	10	5	3	51
0	21	11	4	2	38
5	22	10	4	2	43
3	22	12	7	2	46
3	23	12	5	2	45
9	22	12	6	3	52
6	19	9	4	2	40
4	23	11	5	2	45

## Sheet: 工作表2
	Source	IMF1	IMF2	IMF3	IMF4	IMF5		IMF1	IMF2	IMF3	IMF4	IMF5
pb0001	10	11	23	11	6	2	P-value	0.632994	0.11031	0.0167125	0.0174203	0.00205343
pb0002	9	2	28	17	7	3	AvgPB	6.25	27.2	14.2	6.45	2.65
pb0003	12	11	29	13	5	2	AvgNP	6.97561	28.1707	15.4146	7.19512	3.29268
pb0004	22	9	30	13	7	3
pb0005	14	14	27	14	4	2
pb0006	9	8	25	13	5	2
pb0007	9	0	28	14	6	3
pb0008	18	21	25	16	8	3
pb0009	8	0	30	15	7	3
pb0010	7	3	23	9	5	2
pb0011	12	9	29	14	7	4
pb0012	4	0	25	15	7	2
pb0013	9	7	27	14	7	3
pb0014	5	0	30	16	7	3
pb0015	12	10	25	16	6	3
pb0016	6	2	29	15	7	2
pb0017	4	4	28	15	6	3
pb0018	8	8	28	15	8	3
pb0019	8	4	28	14	7	3
pb0020	12	2	27	15	7	2
np0001	12	7	26	16	6	3
np0002	9	7	29	15	8	2
np0003	8	8	28	16	9	4
np0004	11	2	24	14	7	3
np0005	9	4	28	17	10	5
np0006	3	0	30	17	7	5
np0007	13	15	26	15	6	2
np0008	11	8	27	15	7	3
np0009	11	9	26	16	8	4
np0010	3	2	31	17	8	3
np0011	9	7	26	16	7	3
np0012	7	2	28	16	6	3
np0013	7	2	30	18	8	4
np0014	12	16	28	17	8	5
np0015	12	16	31	13	7	4
np0016	6	2	28	15	8	4
np0017	11	18	26	15	7	4
np0018	10	0	32	17	9	4
np0019	17	14	29	15	6	3
np0020	13	10	31	15	7	4
np0021	12	13	27	15	7	4
np0022	15	11	28	14	6	2
np0023	6	2	29	14	8	3
np0024	9	4	27	13	5	2
np0025	14	10	30	17	7	3
np0026	7	12	29	17	8	4
np0027	11	10	27	18	9	5
np0028	6	0	25	12	5	3
np0029	4	0	31	16	8	4
np0030	11	10	31	15	6	3
np0031	5	0	28	16	7	4
np0032	6	3	27	17	6	2
np0033	11	4	26	15	7	2
np0034	7	18	29	14	8	4
np0035	10	4	26	14	6	3
np0036	12	10	26	12	5	2
np0037	8	0	32	19	9	4
np0038	8	3	28	15	7	2
np0039	9	10	31	17	9	3
np0040	11	9	24	12	6	2
np0041	7	4	30	15	7	2
